# Supplementary material for: Synthesis and luminescent properties of three excellent yellow emissive Cu(i) complexes based on the diphosphine ligand and the diimine ligand
Source: Royal Society of Chemistry journal article supplement (doi:10.1039/d4ce00206g), 2024-01-01
Supplement: d4ce00206g4.pdf [file d4ce00206g4.pdf]

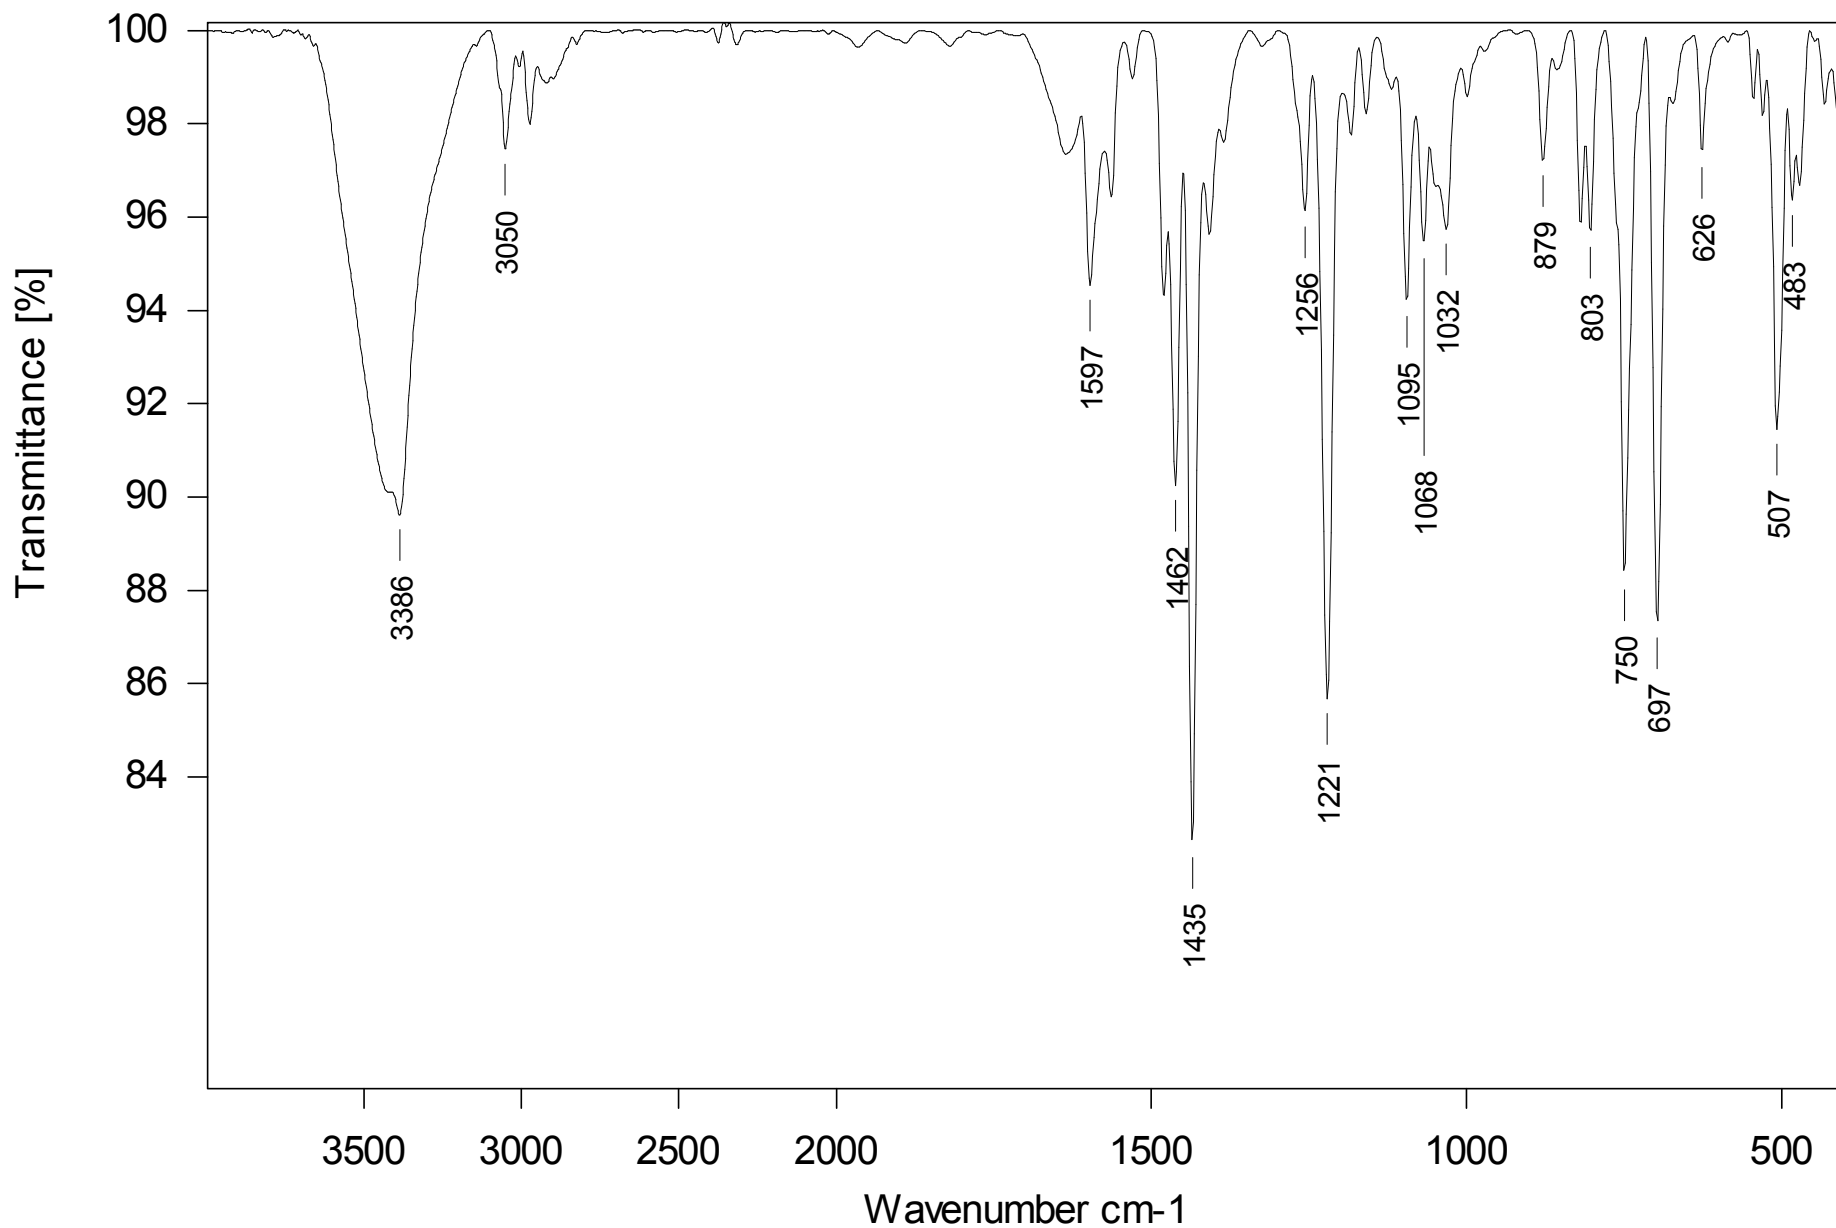

|                                      |                              |
|--------------------------------------|------------------------------|
| Path of File D:\IR\JQH\lx\2022.12.04 | Filename LZX-148.0           |
| Sample Name LZX-148                  | Sample Form LZX-148          |
| Date of Measurement 22/10/2009       | Time of Measurement 20:15:55 |
| Resolution 5                         | Signal Gain Sample Automatic |
