# Supplementary material for: Synthesis and luminescent properties of three excellent yellow emissive Cu(i) complexes based on the diphosphine ligand and the diimine ligand
Source: Royal Society of Chemistry journal article supplement (doi:10.1039/d4ce00206g), 2024-01-01
Supplement: d4ce00206g11.pdf [file d4ce00206g11.pdf]

## Support information

### Synthesis and luminescent properties of three excellent yellow emissive Cu(I) complexes based on the diphosphine ligand and diimine ligand

Wen-Long Mou,<sup>a</sup> Cheng-Jie Gao,<sup>a</sup> Zi-Xi Li,<sup>a</sup> Si-Jie Fan,<sup>a</sup> Chuan-Bin Hou,<sup>a</sup> Jing-Tong Zhao,<sup>a</sup> Shuai Zhang,<sup>a</sup> Zhong-Feng Li,<sup>a</sup> Hong-Liang Han,<sup>a</sup> Chun-Bo Duan,<sup>b</sup> Guo Wang<sup>\*a</sup> and Qiong-Hua Jin,<sup>\*acde</sup>

<sup>a</sup> Department of Chemistry, Capital Normal University, Beijing 100048, China. E-mail: [jinqh@cnu.edu.cn](mailto:jinqh@cnu.edu.cn), [jinqh204@163.com](mailto:jinqh204@163.com)

<sup>b</sup> Ministry of Education and School of Chemistry and Material Science Heilongjiang University, Harbin 150080, China.

<sup>c</sup> State Key Laboratory of Structural Chemistry, Fujian Institute of Research on the Structure of Matter, Chinese Academy of Sciences, Fuzhou, Fujian 350002, China

<sup>d</sup> State Key Laboratory of Elemento-Organic Chemistry, Nankai University, Tianjin 300071, China.

<sup>e</sup> Key Laboratory of Advanced Energy Materials Chemistry (Ministry of Education), Nankai University, Tianjin 300071, China.

\* Corresponding author.

E-mail address: [jinqh204@163.com](mailto:jinqh204@163.com) (Qiong-Hua Jin)

† These authors contributed equally to this work.

### **Caption of Figure**

**Fig. S1 The IR spectra for complex 1**

**Fig. S2 The IR spectra for complex 2**

**Fig. S3 The IR spectra for complex 3**

**Fig. S4 The  $^1\text{H}$  NMR spectra for complex 1**

**Fig. S5 The  $^1\text{H}$  NMR spectra for complex 2**

**Fig. S6 The  $^1\text{H}$  NMR spectra for complex 3**

**Fig. S7 The  $^{31}\text{P}$  NMR spectra for complex 1**

**Fig. S8 The  $^{31}\text{P}$  NMR spectra for complex 2**

**Fig. S9 The  $^{31}\text{P}$  NMR spectra for complex 3**

**Fig. S10 UV-vis spectra of bipy and POP at room temperature**

### **Caption of Table**

**Table. S1 Selected bond lengths ( $\text{\AA}$ ) and angles ( $^\circ$ ) for complexes 1-3.**

**Table. S2 Intermolecular weak interactions for complexes 1-3.**

**Table. S3 The composition of the S-state HOMO and LUMO orbitals for 1, 2, and 3 in the optimized  $S_0$  structure.**

**Table. S4 Energy, oscillator strength and major contribution of the calculated transitions for complexes 1-3.**

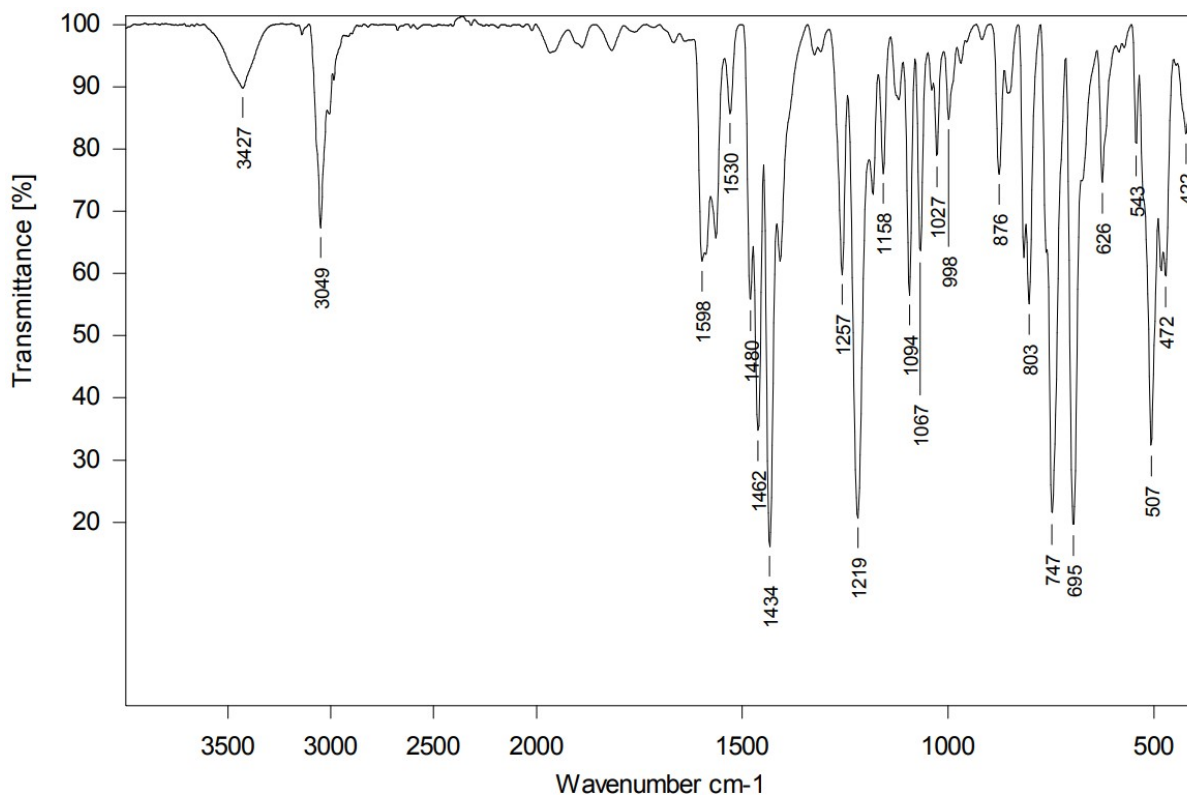

**Fig. S1** The IR spectra for complex 1

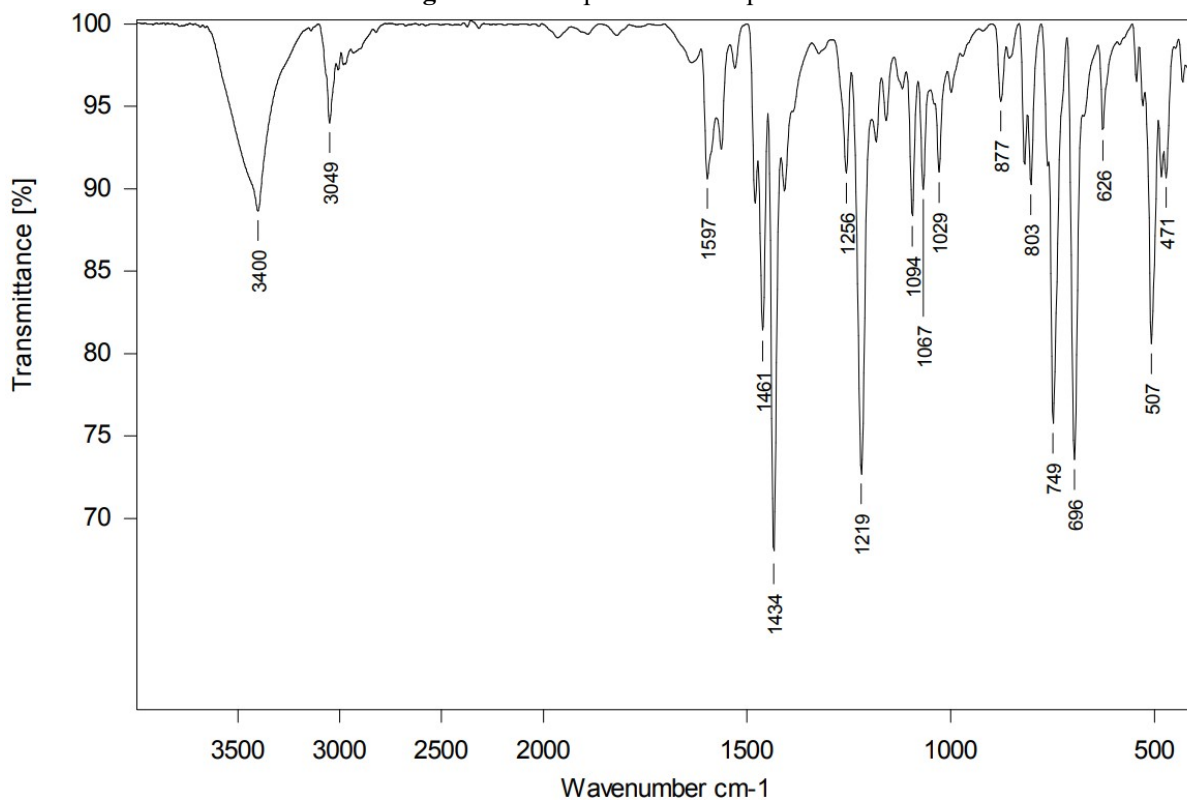

**Fig. S2** The IR spectra for complex 2

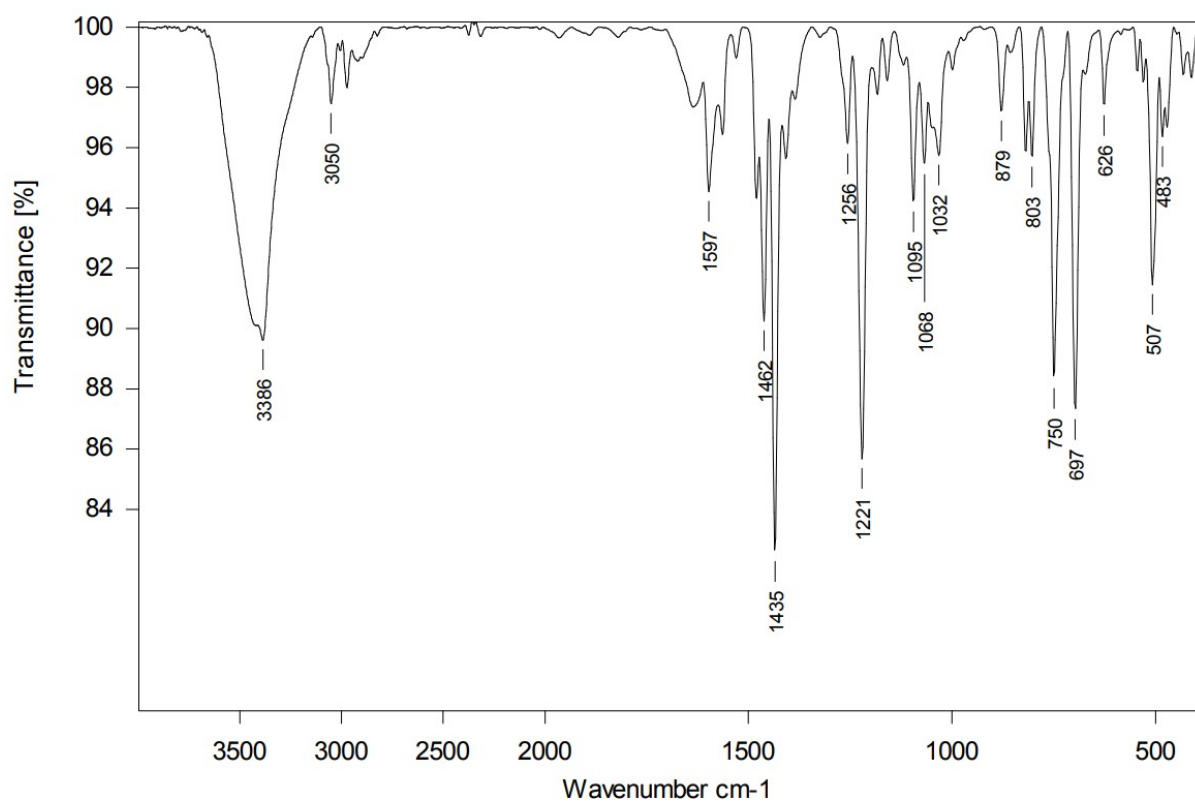

**Fig. S3** The IR spectra for complex **3**

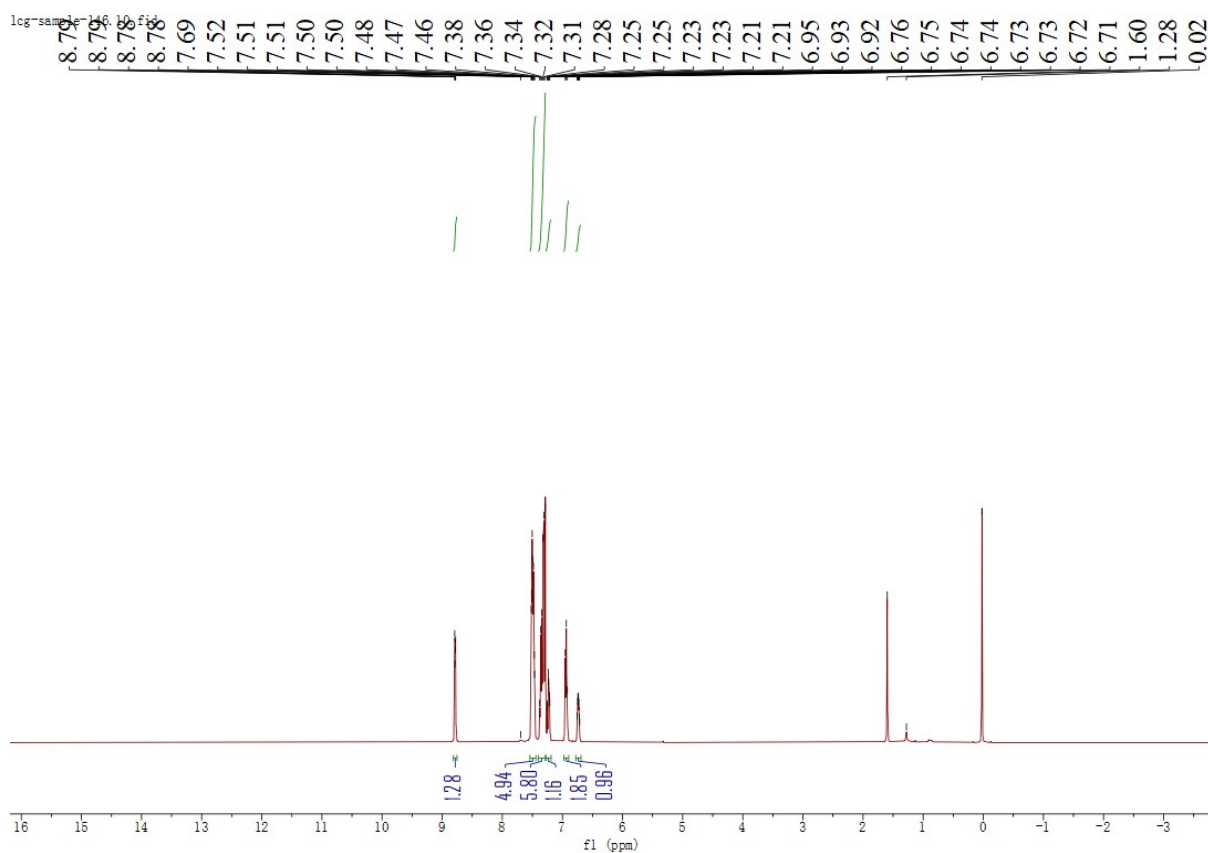

**Fig. S4** The <sup>1</sup>H NMR spectra for complex **1**

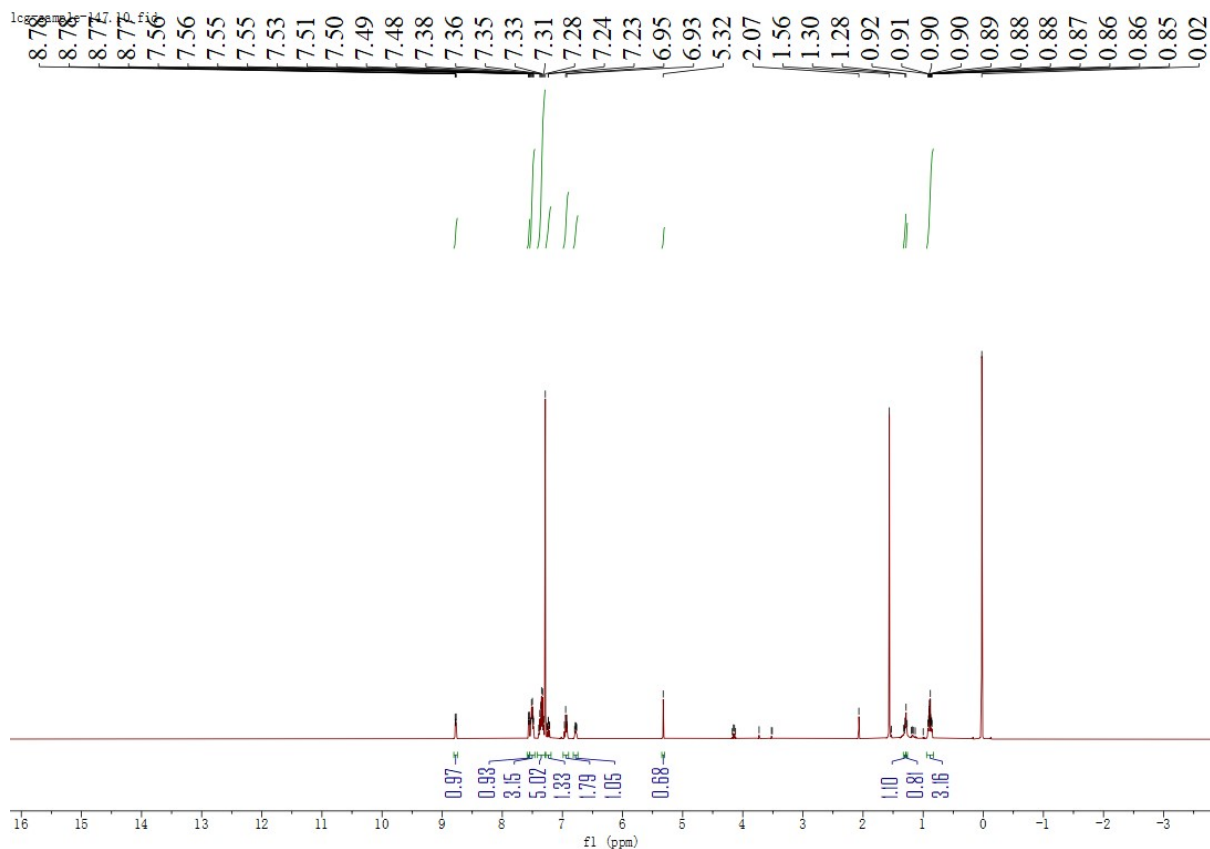

**Fig. S5** The  $^1\text{H}$  NMR spectra for complex 2

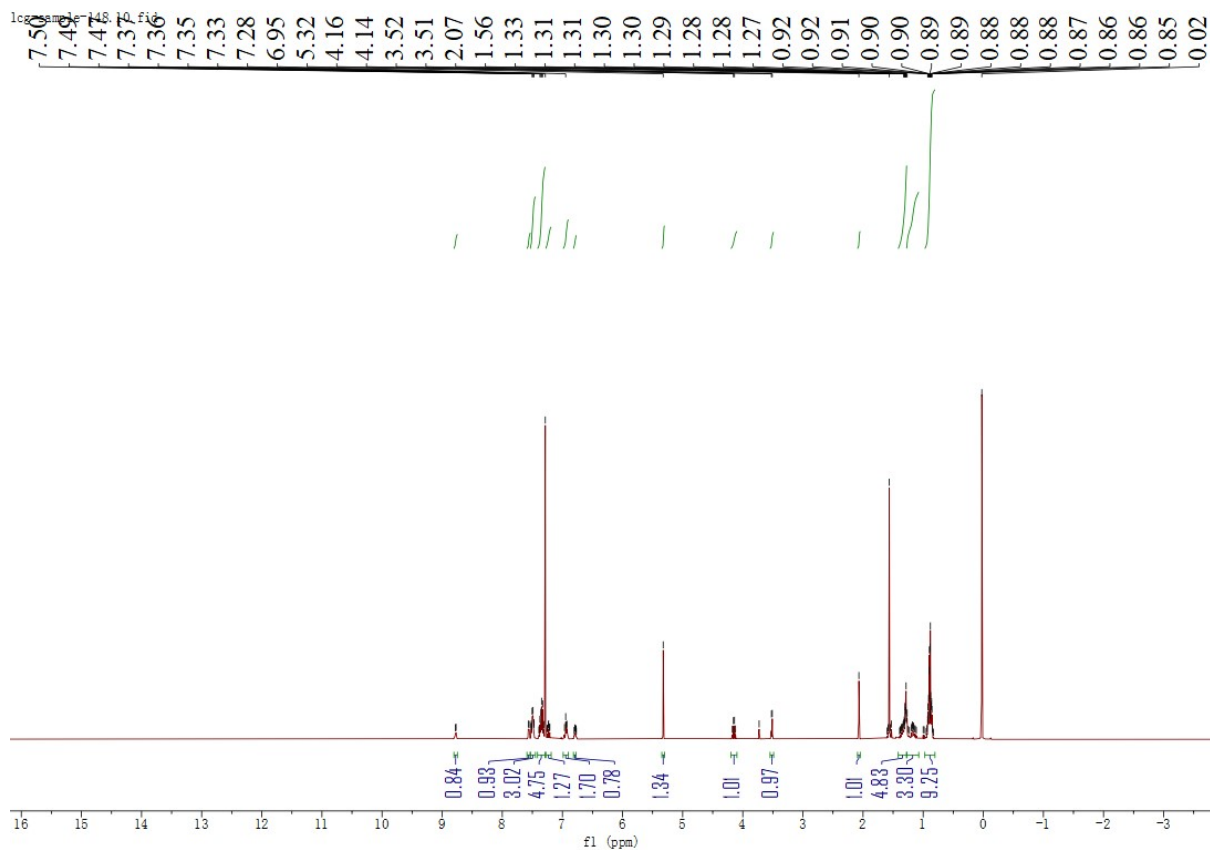

**Fig. S6** The  $^1\text{H}$  NMR spectra for complex 3

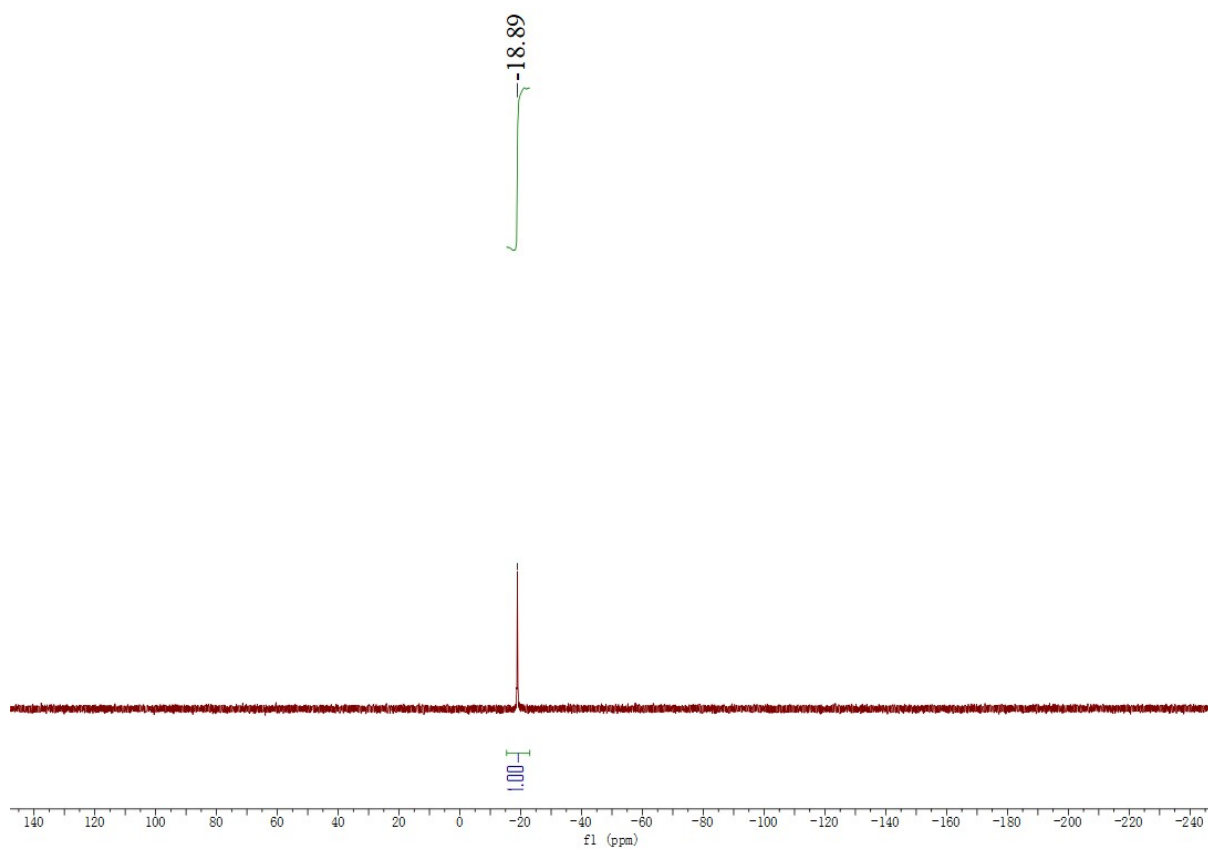

**Fig. S7** The  $^{31}\text{P}$  NMR spectra for complex **1**

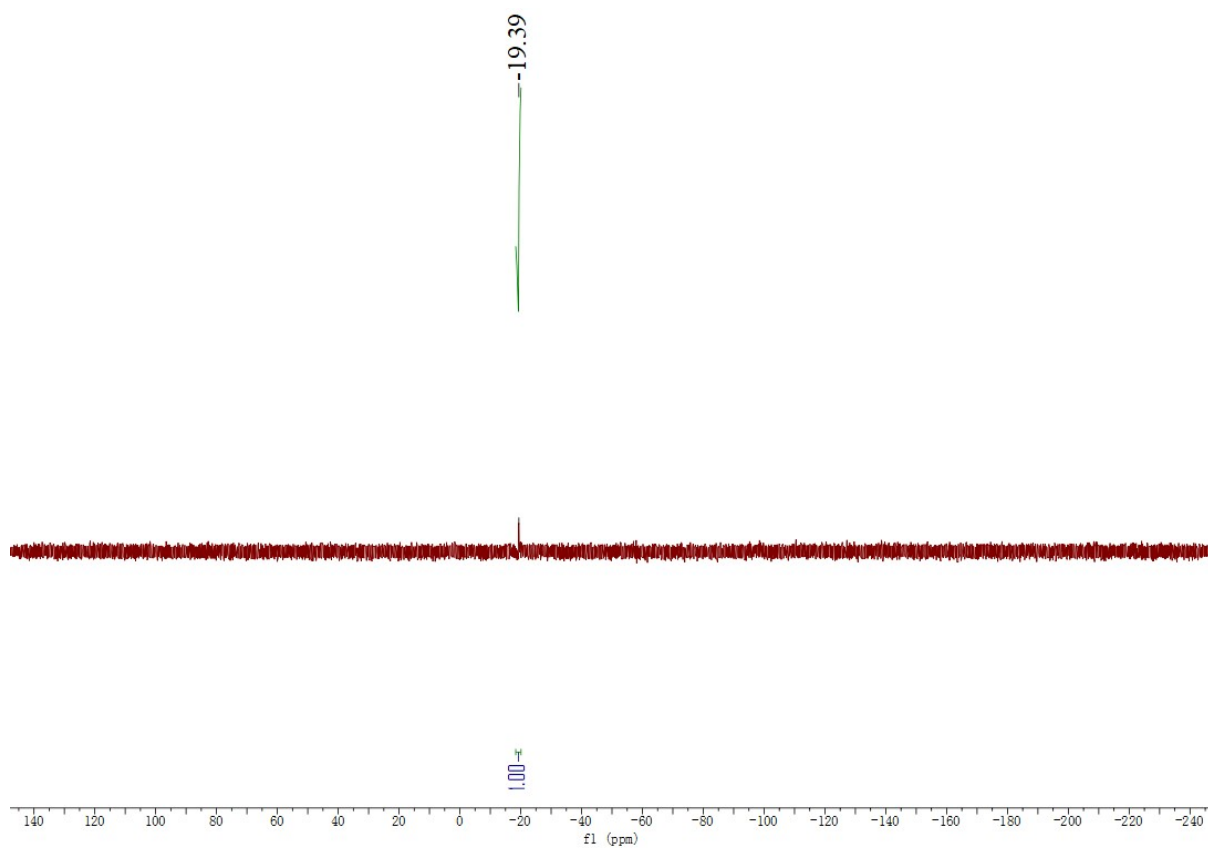

**Fig. S8** The  $^{31}\text{P}$  NMR spectra for complex **2**

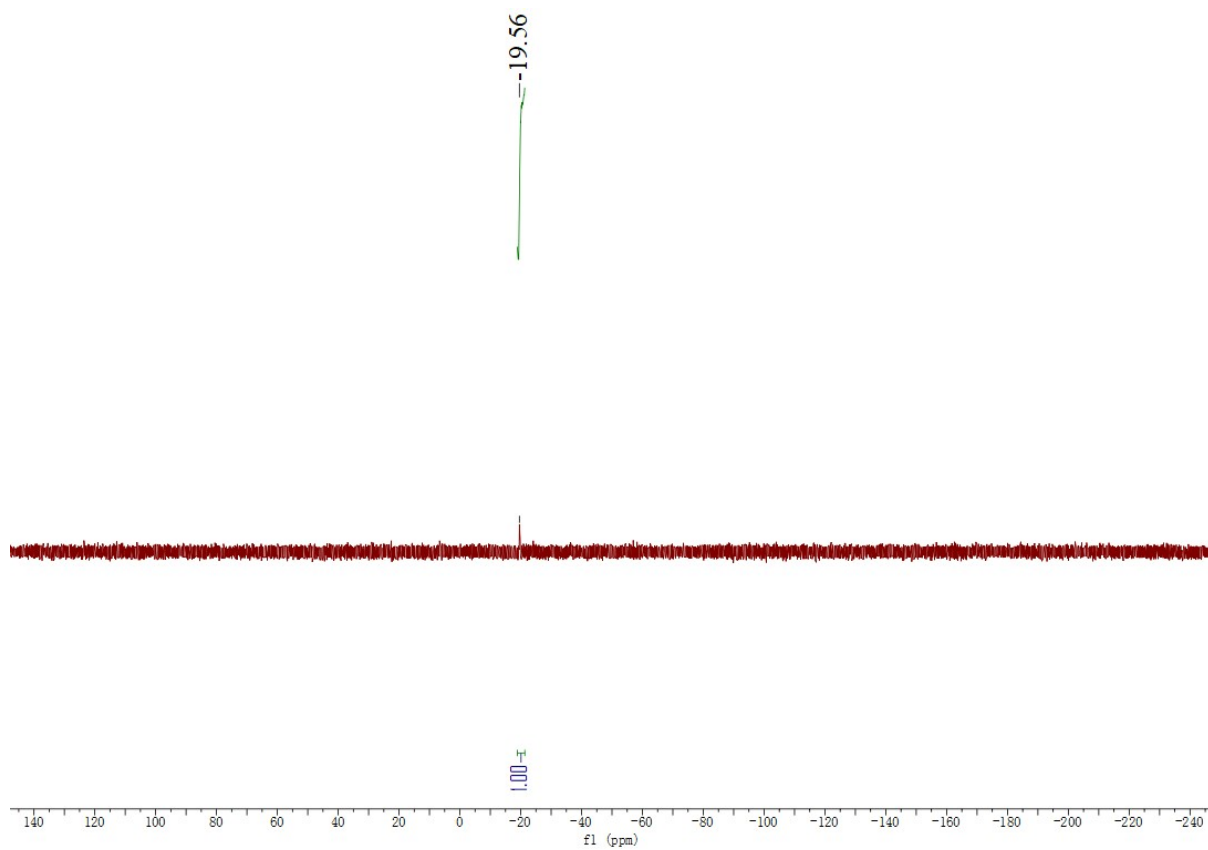

**Fig. S9** The  $^{31}\text{P}$  NMR spectra for complex **3**

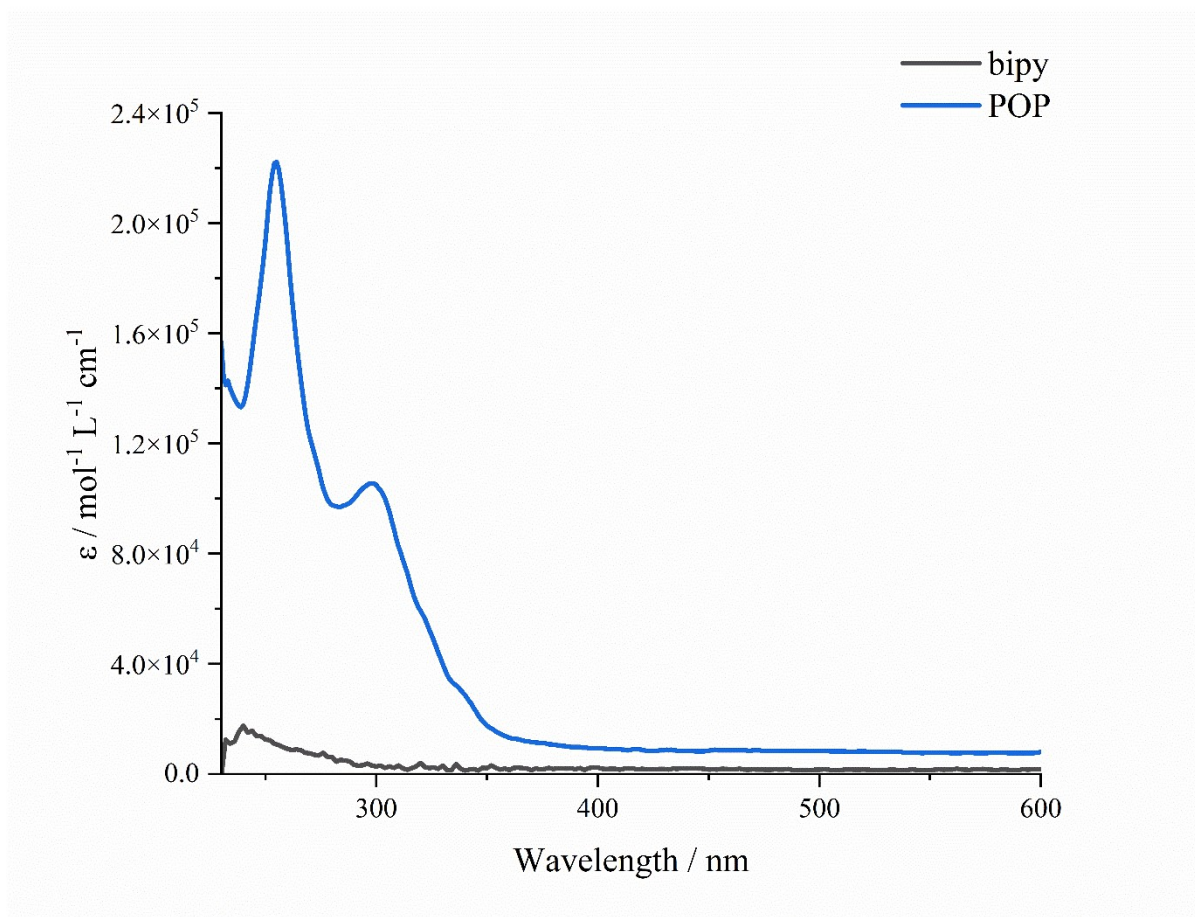

**a**

**Fig. S10** UV-vis spectra of bipy and POP at room temperature



**Table. S1** Selected bond lengths (Å) and angles (°) for complexes **1-3**.

| <b>1</b>    |            |                  |           |
|-------------|------------|------------------|-----------|
| Cu(1)-P(1)  | 2.3057(9)  | P(1)-Cu(1)-P(2)  | 112.30(3) |
| Cu(1)-P(2)  | 2.2645(9)  | P(1)-Cu(1)-I(1)  | 107.80(3) |
| Cu(1)-I(1)  | 2.6115(6)  | P(1)-Cu(1)-N(1)  | 106.53(8) |
| Cu(1)-N(1)  | 2.1056(24) | P(2)-Cu(1)-I(1)  | 114.09(3) |
|             |            | P(2)-Cu(1)-N(1)  | 109.73(7) |
|             |            | I(1)-Cu(1)-N(1)  | 105.93(7) |
| <b>2</b>    |            |                  |           |
| Cu(1)-P(1)  | 2.2734(9)  | P(1)-Cu(1)-P(2)  | 111.45(3) |
| Cu(1)-P(2)  | 2.2837(9)  | P(1)-Cu(1)-Br(1) | 115.74(3) |
| Cu(1)-Br(1) | 2.4551(6)  | P(1)-Cu(1)-N(1)  | 109.42(8) |
| Cu(1)-N(1)  | 2.1231(24) | P(2)-Cu(1)-Br(1) | 109.24(3) |
|             |            | P(2)-Cu(1)-N(1)  | 105.86(7) |
|             |            | Br(1)-Cu(1)-N(1) | 104.46(8) |
| <b>3</b>    |            |                  |           |
| Cu(1)-P(1)  | 2.2726(10) | P(1)-Cu(1)-P(2)  | 111.58(3) |
| Cu(1)-P(2)  | 2.2578(8)  | P(1)-Cu(1)-Cl(1) | 106.24(4) |
| Cu(1)-Cl(1) | 2.3357(11) | P(1)-Cu(1)-N(1)  | 108.68(8) |
| Cu(1)-N(1)  | 2.0785(25) | P(2)-Cu(1)-Cl(1) | 116.95(4) |
|             |            | P(2)-Cu(1)-N(1)  | 110.97(8) |
|             |            | Cl(1)-Cu(1)-N(1) | 101.74(8) |

**Table. S2** Intermolecular weak interactions for complexes **1** and **3**.

|          | Cg(i)/C-H→Cg(i)/(A) | Cg                                                                    | Symmetry code    | Cg(A)/H··<br>Cg(B)/Å |
|----------|---------------------|-----------------------------------------------------------------------|------------------|----------------------|
| <b>1</b> | C38-H38A→Cg(6)      | C25-C26-C27-C28-<br>C29-C30                                           | x, -1+y, z       | 2.87                 |
|          | Cg(4)··Cg(6)        | Cg(4): C7-C8-C9-<br>C10-C11-C12<br>Cg(6): C19-C20-C21-<br>C22-C23-C24 | x, y, z          | 3.8358               |
| <b>3</b> | C16-H16→Cg(6)       | C19-C20-C21-C22-<br>C23-C24                                           | x, 1/2-y, -1/2+z | 2.85                 |
|          | O2-H2A→Cl1          | /                                                                     | 1-x, -y, 1-z     | 2.36                 |
|          | C35-H35→Cl2         | /                                                                     | /                | 2.79                 |
|          | C47-H47B→Cl1        | /                                                                     | 1-x, 1/2+y, 1-z  | 2.67                 |

**Table. S3** The composition of the S-state HOMO and LUMO orbitals for **1**, **2** and **3** in the optimized S<sub>0</sub> structure.

|                  |        | Cu / % | X / % | Ligand N / % | Ligand P / % |
|------------------|--------|--------|-------|--------------|--------------|
| Complex <b>1</b> | HOMO-6 | 27.70  | 6.61  | 3.26         | 62.42        |
|                  | LUMO   | 2.73   | 0.02  | 90.34        | 6.90         |
| Complex <b>2</b> | HOMO-6 | 35.34  | 7.92  | 4.50         | 52.24        |
|                  | LUMO   | 3.24   | 0.01  | 89.54        | 7.21         |
| Complex <b>3</b> | HOMO-3 | 43.06  | 2.11  | 5.56         | 49.27        |
|                  | LUMO   | 2.26   | 0.03  | 92.52        | 5.19         |

**Table. S4** Energy, oscillator strength and major contribution of the calculated transitions for complexes **1-3**.

|          | Energy    |           | Oscillator strength | Contribution % |   |                          |
|----------|-----------|-----------|---------------------|----------------|---|--------------------------|
| <b>1</b> | 2.1412 eV | 579.04 nm | 0.2957              | <b>HOMO-6</b>  | → | <b>LUMO</b> <b>95.18</b> |
| <b>2</b> | 2.1506 eV | 576.50 nm | 0.2599              | HOMO-7         | → | LUMO 5.73                |
|          |           |           |                     | <b>HOMO-6</b>  | → | <b>LUMO</b> <b>89.87</b> |
| <b>3</b> | 2.2058Ev  | 562.09 nm | 0.1523              | <b>HOMO-3</b>  | → | <b>LUMO</b> <b>85.11</b> |
|          |           |           |                     | HOMO           | → | LUMO+1 4.78              |
|          |           |           |                     | HOMO           | → | LUMO+2 2.15              |
