# Supplementary figures and images for: Synthesis and luminescent properties of three excellent yellow emissive Cu(i) complexes based on the diphosphine ligand and the diimine ligand
Source: Royal Society of Chemistry journal article supplement (doi:10.1039/d4ce00206g), 2024-01-01

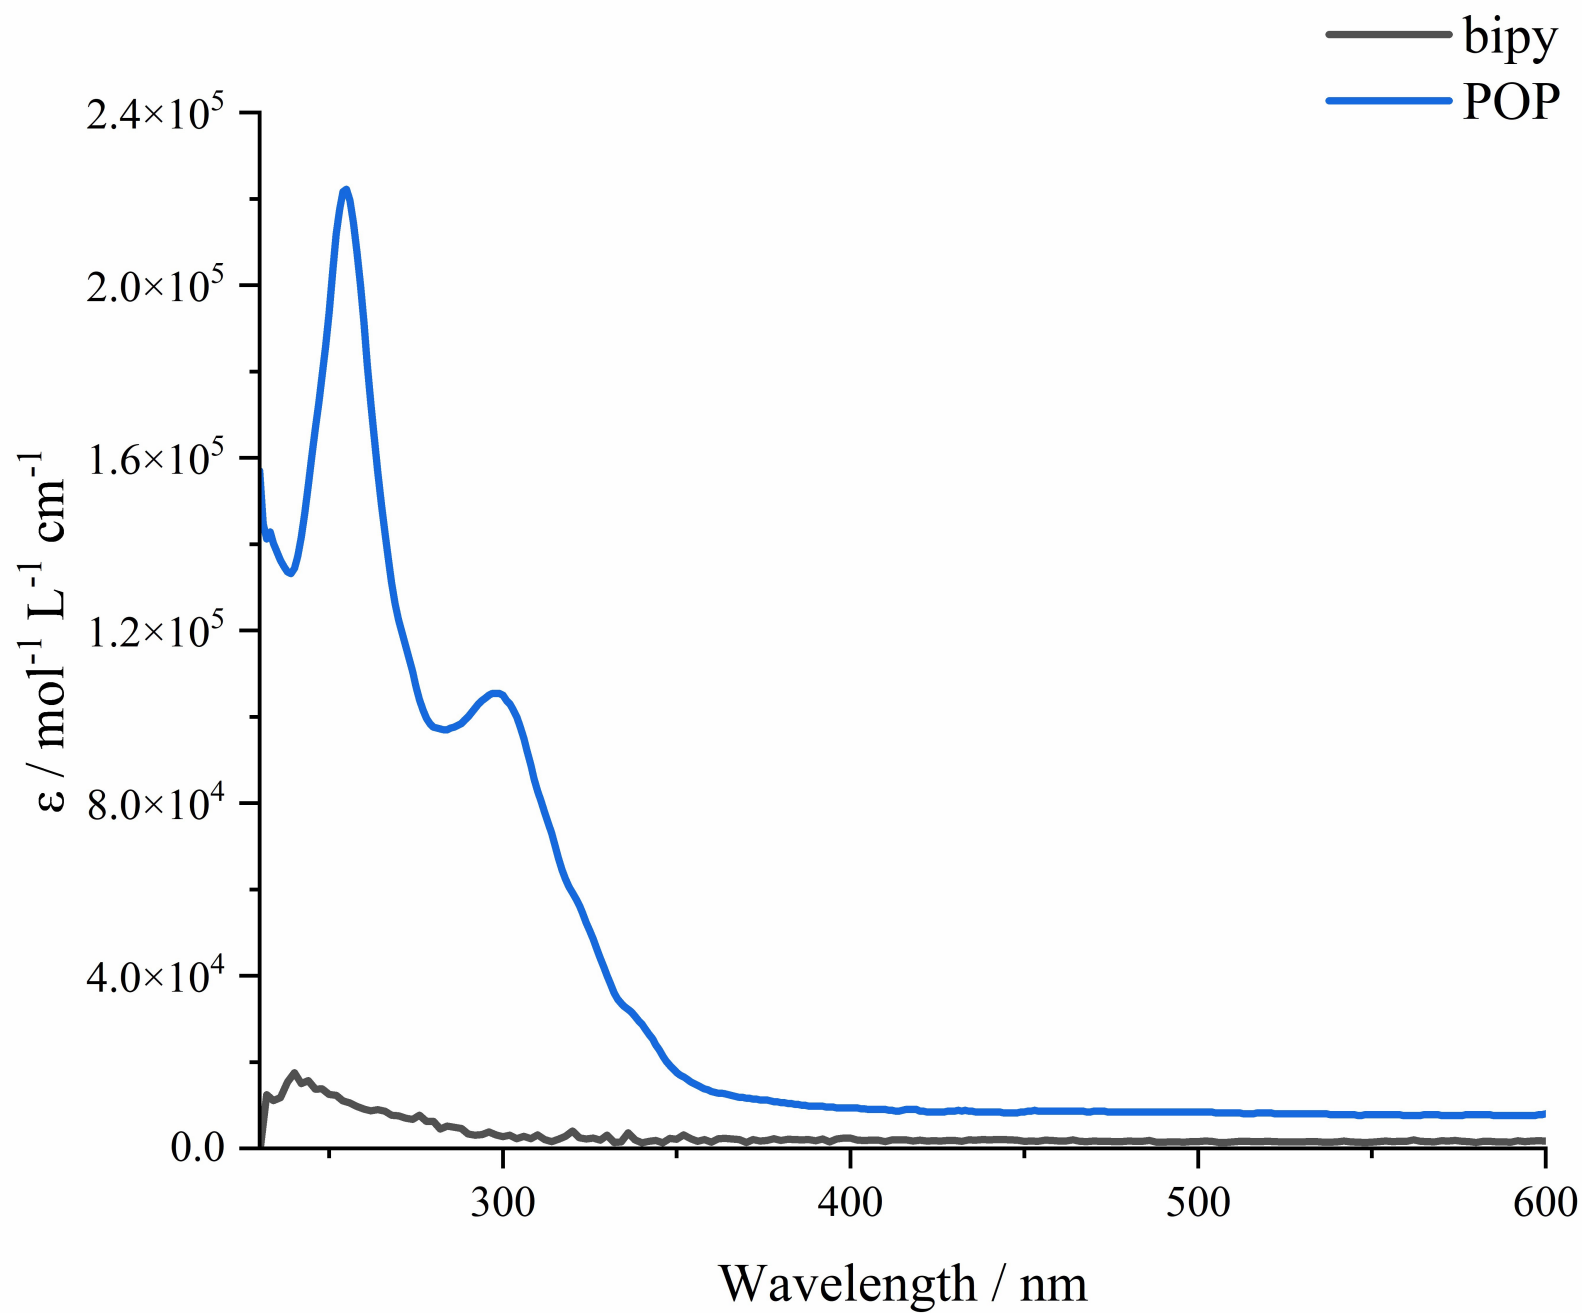

Supplement: d4ce00206g1.pdf [file d4ce00206g1.pdf]

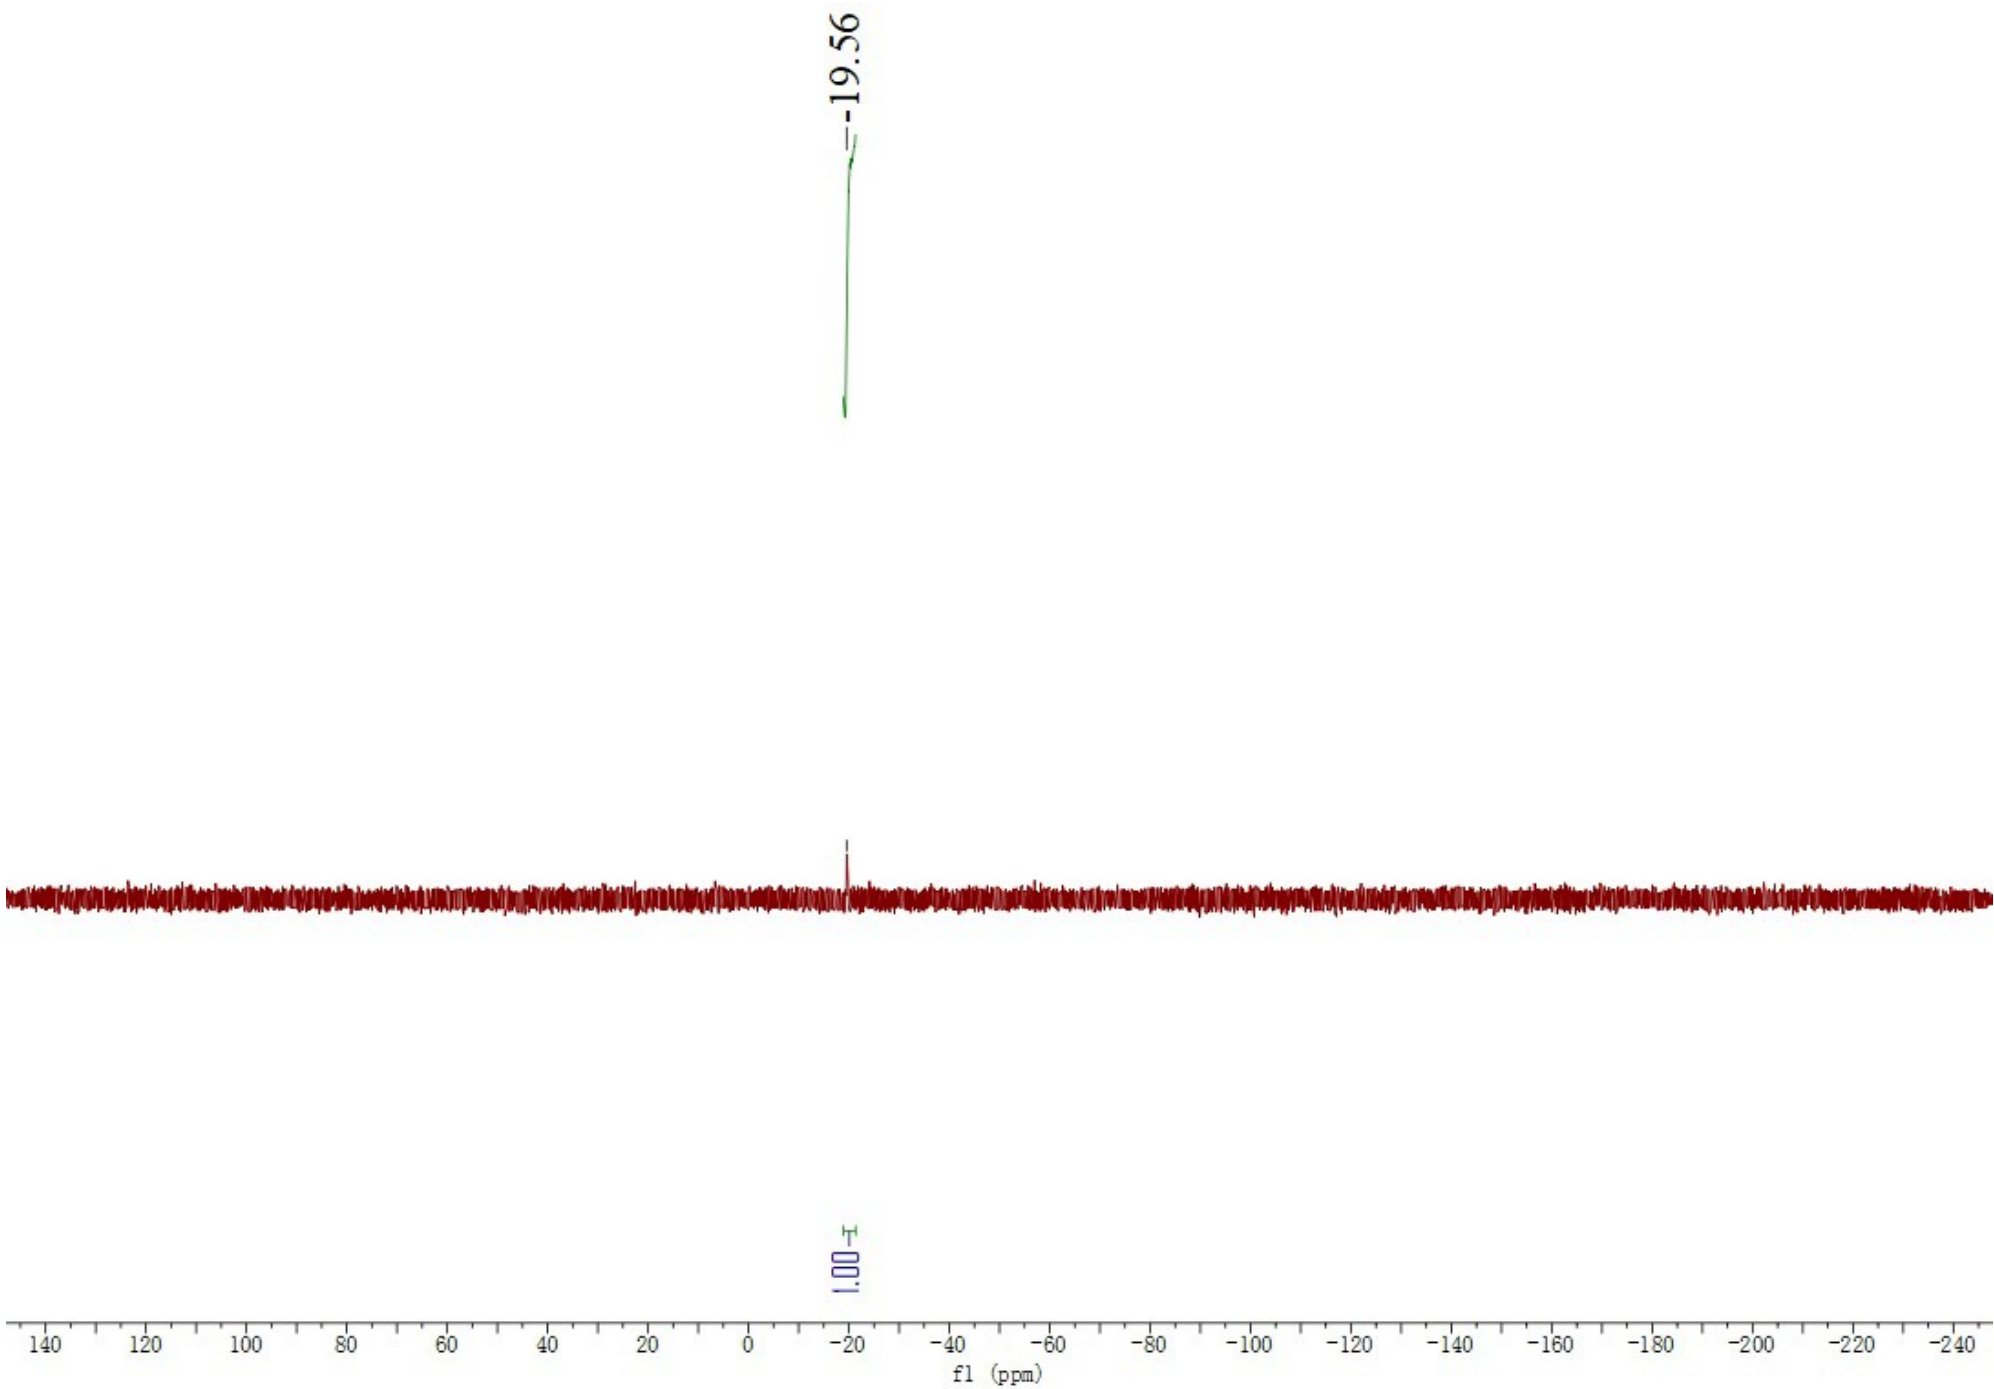

Supplement: d4ce00206g10.pdf [file d4ce00206g10.pdf]

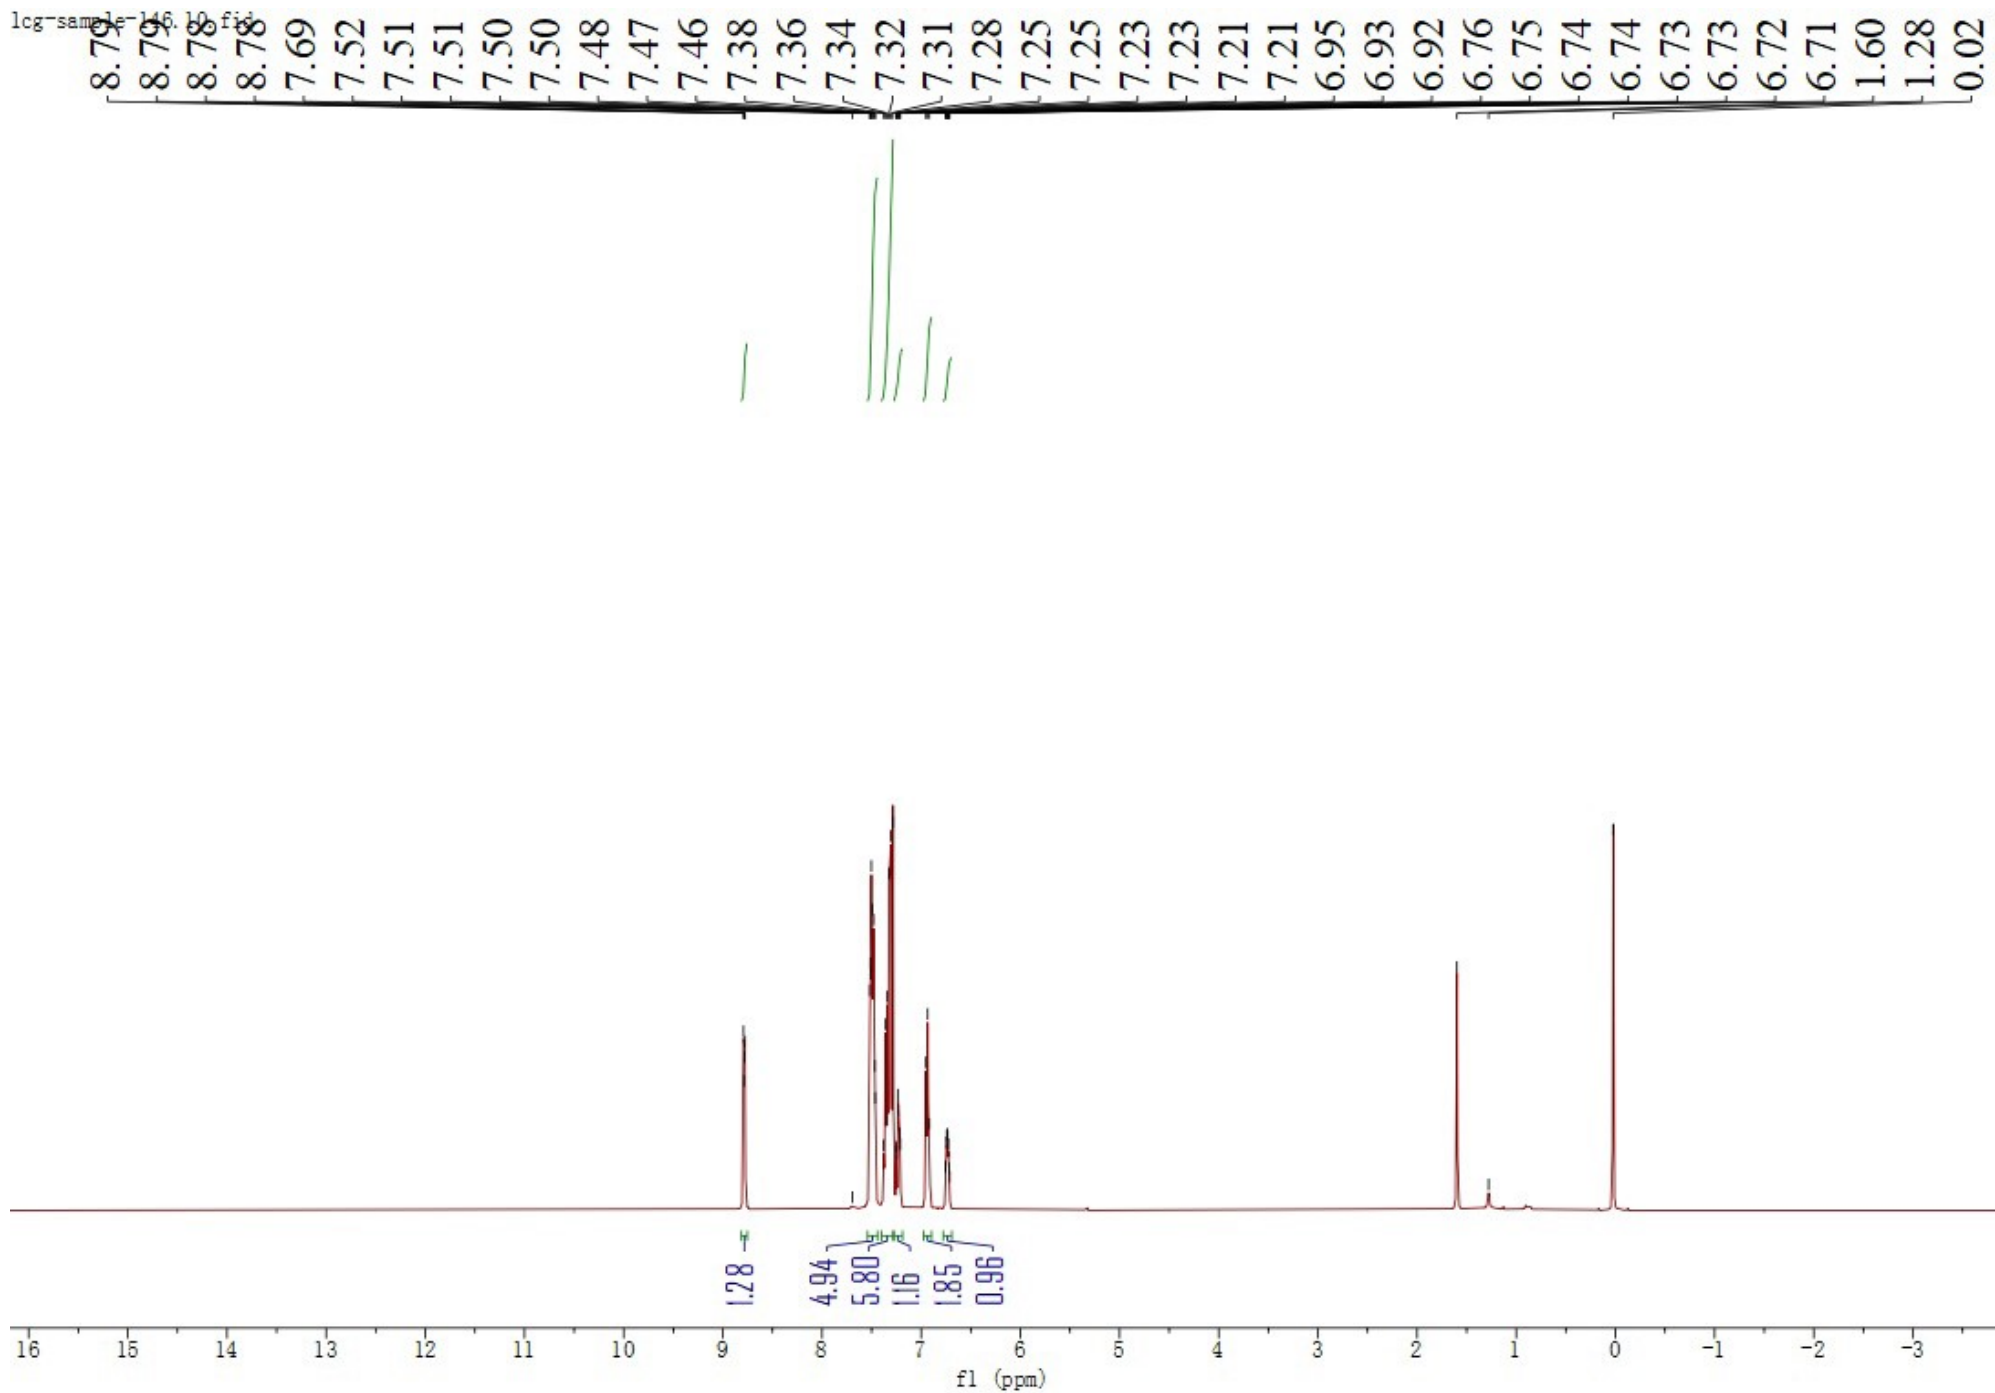

Supplement: d4ce00206g5.pdf [file d4ce00206g5.pdf]

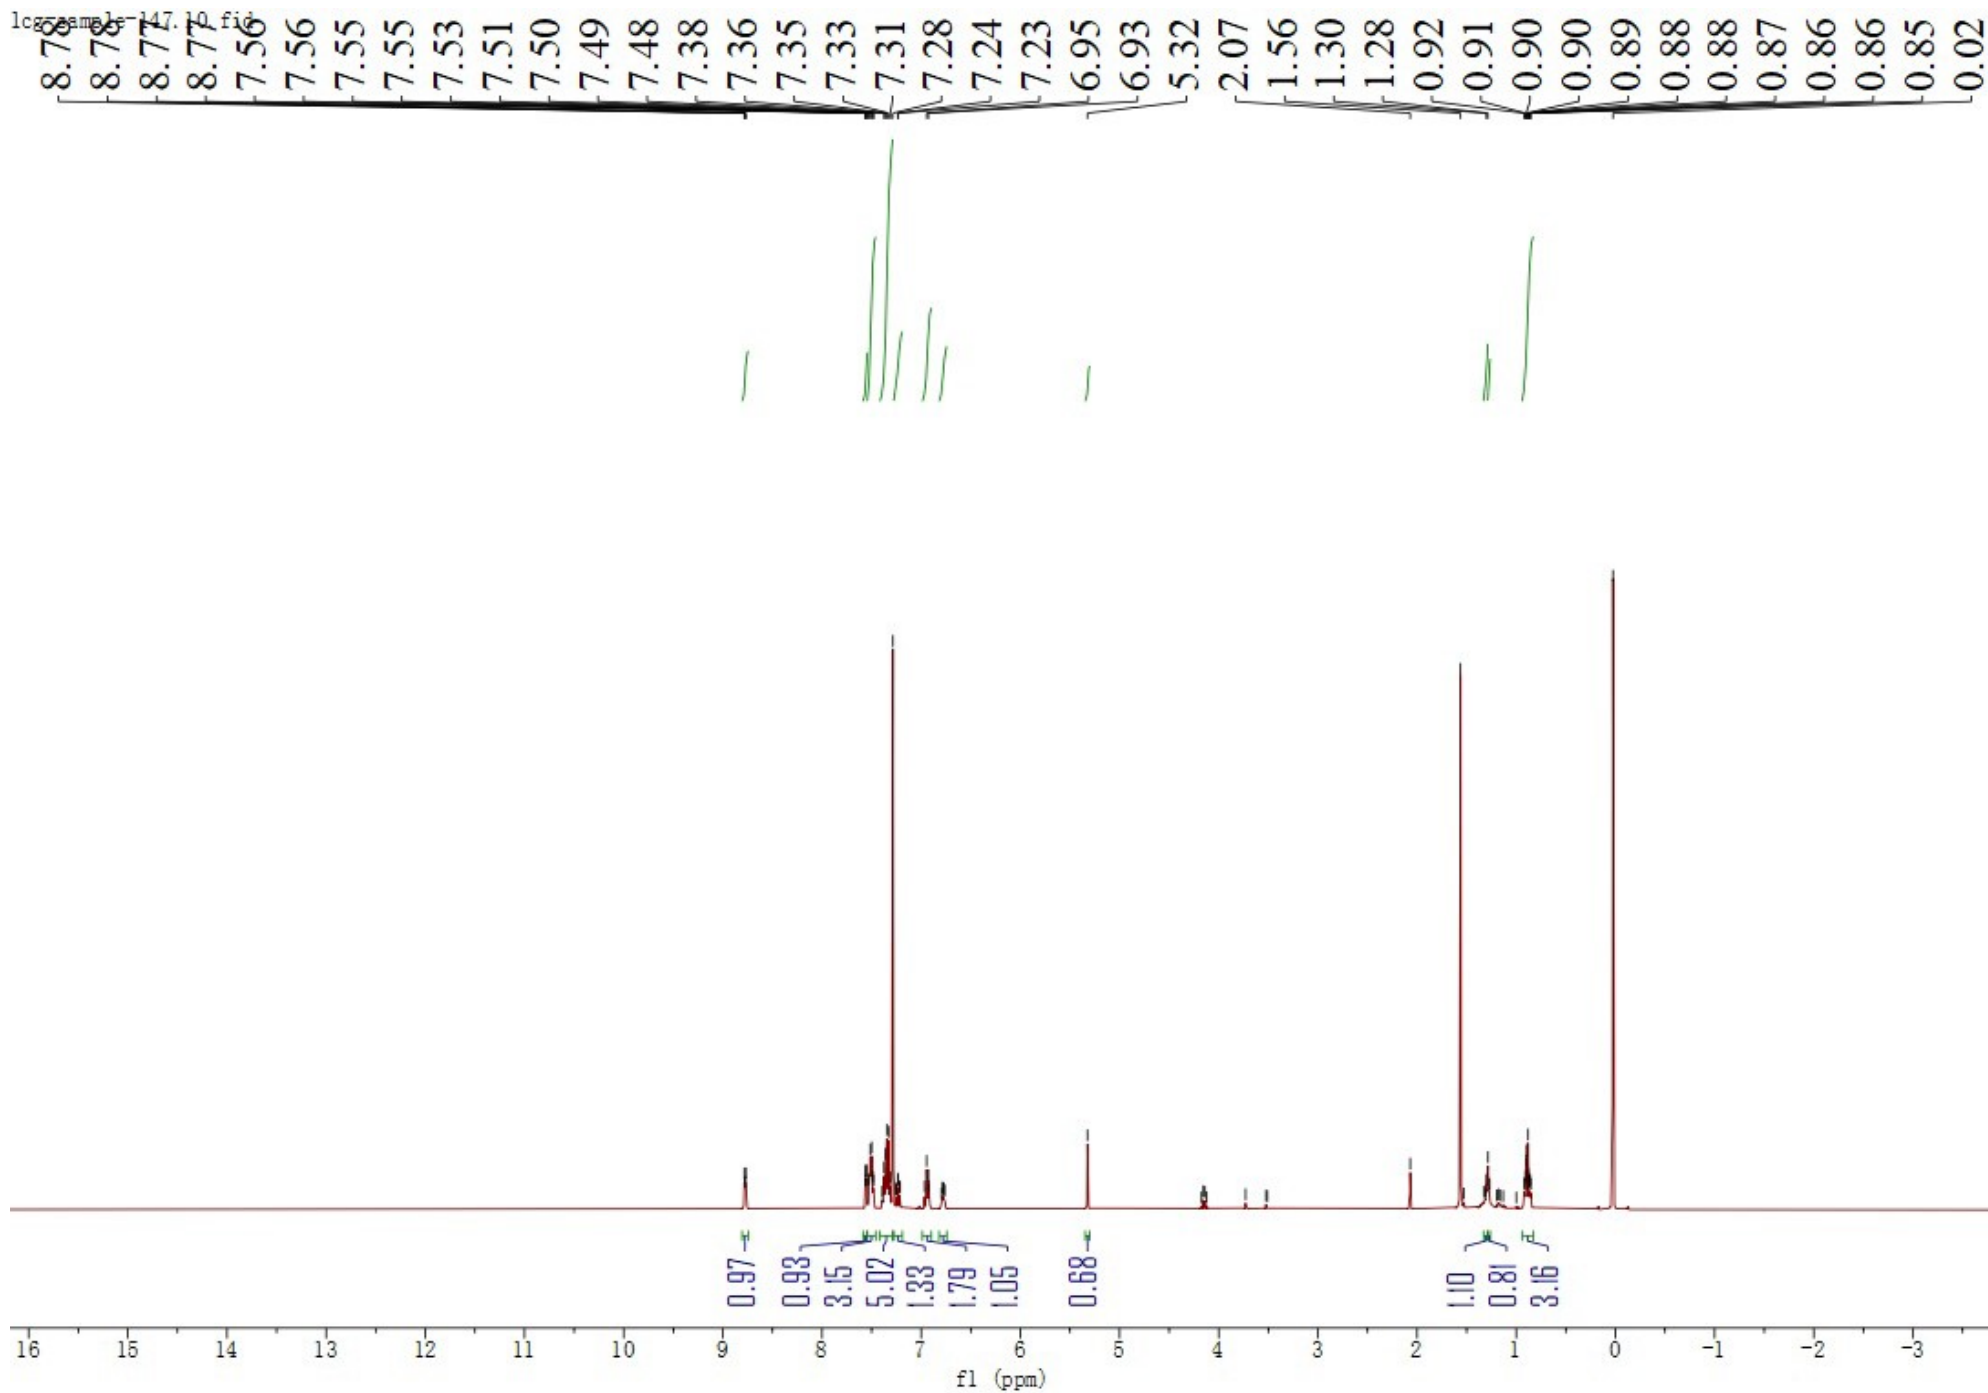

Supplement: d4ce00206g6.pdf [file d4ce00206g6.pdf]

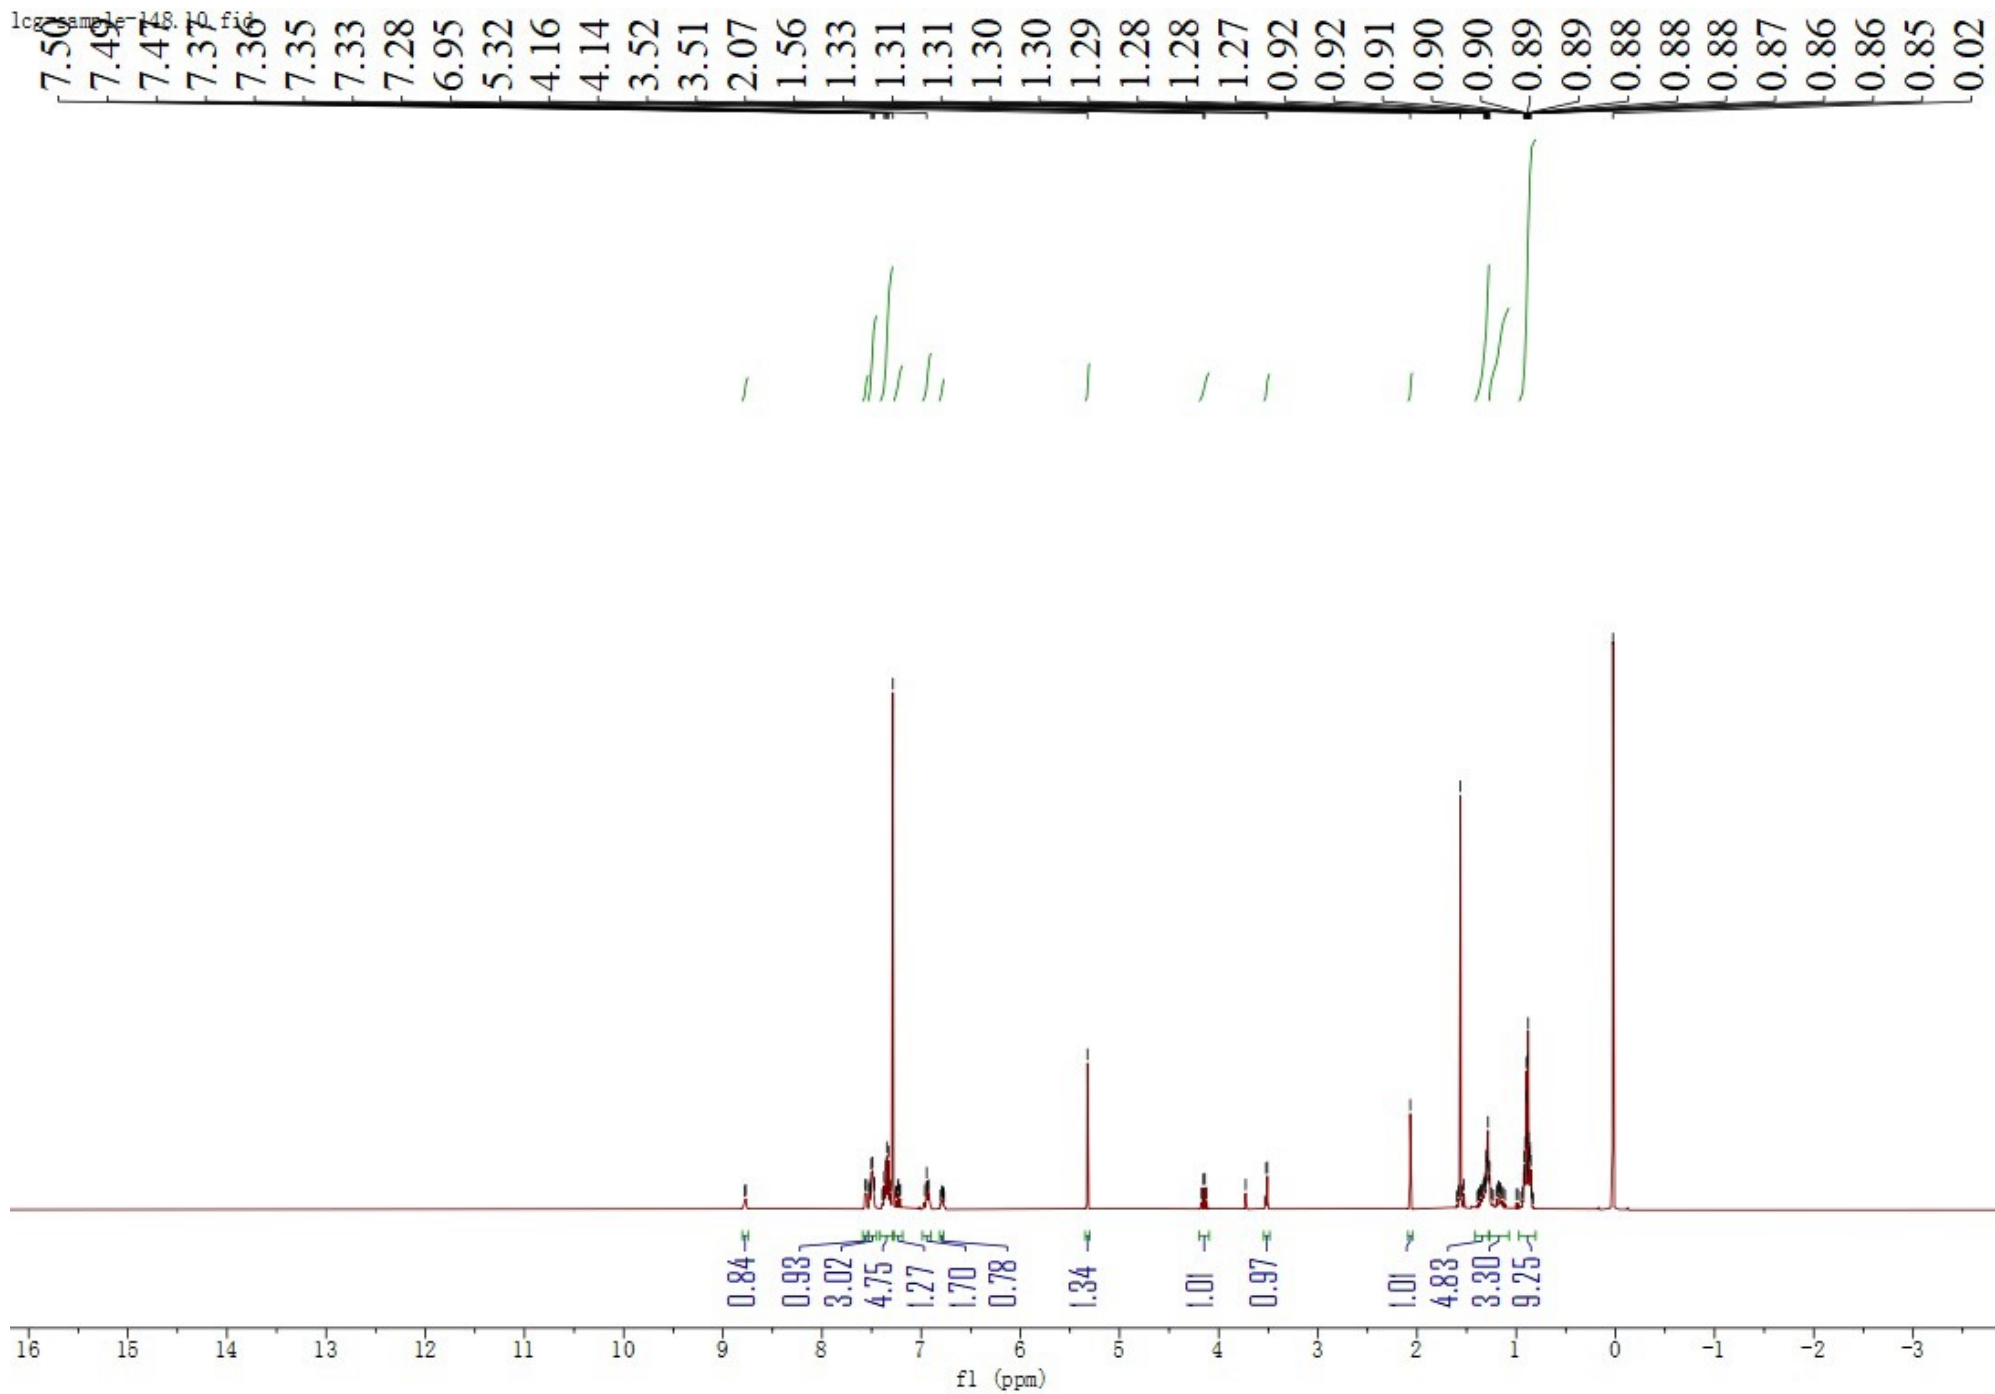

Supplement: d4ce00206g7.pdf [file d4ce00206g7.pdf]

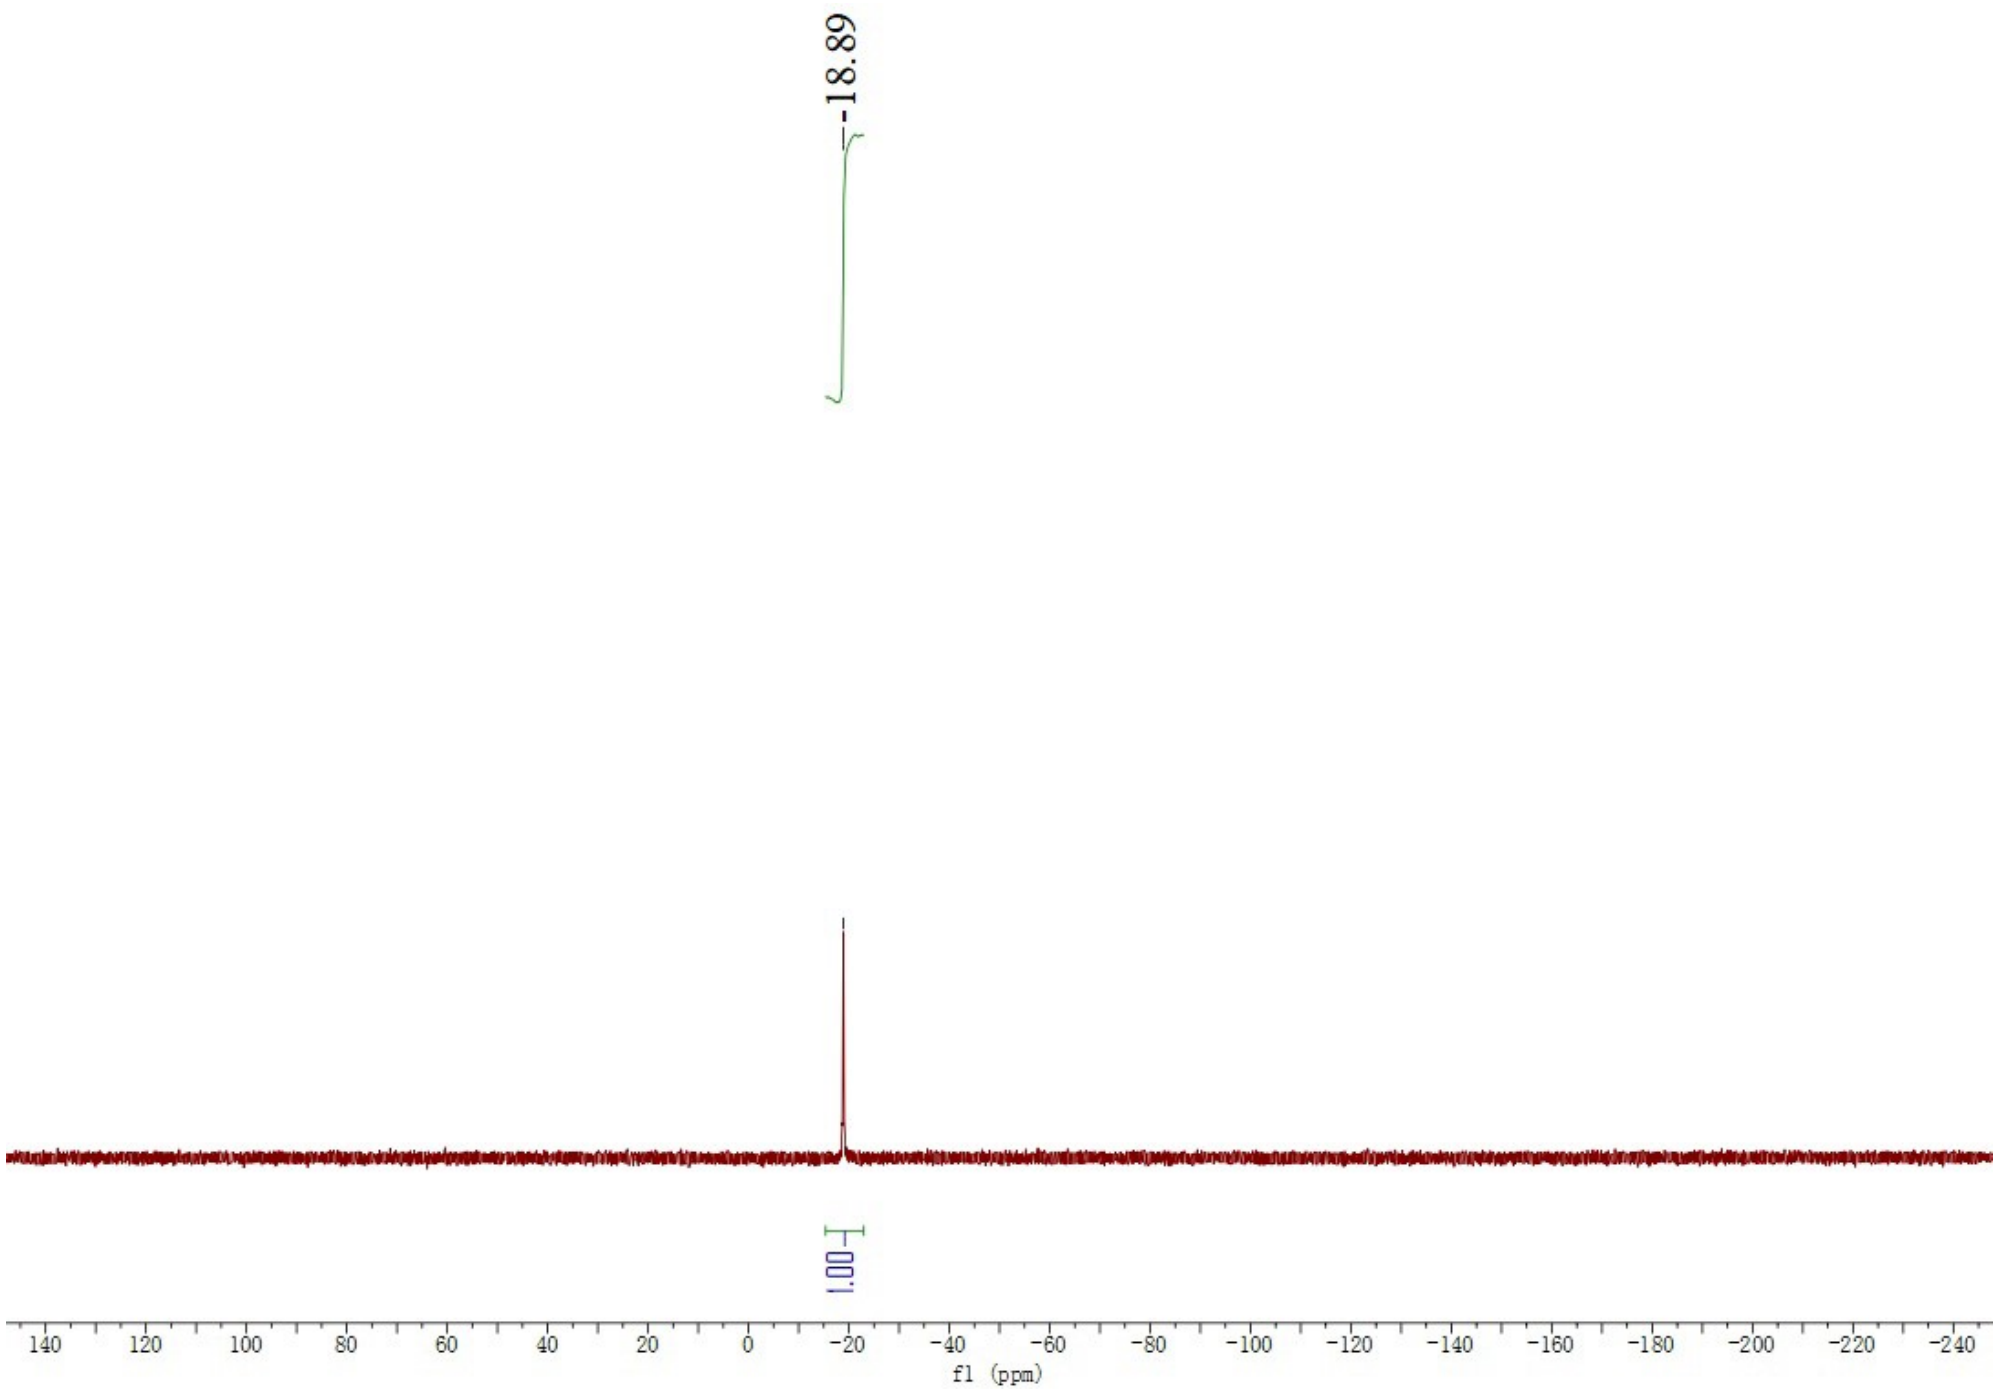

Supplement: d4ce00206g8.pdf [file d4ce00206g8.pdf]

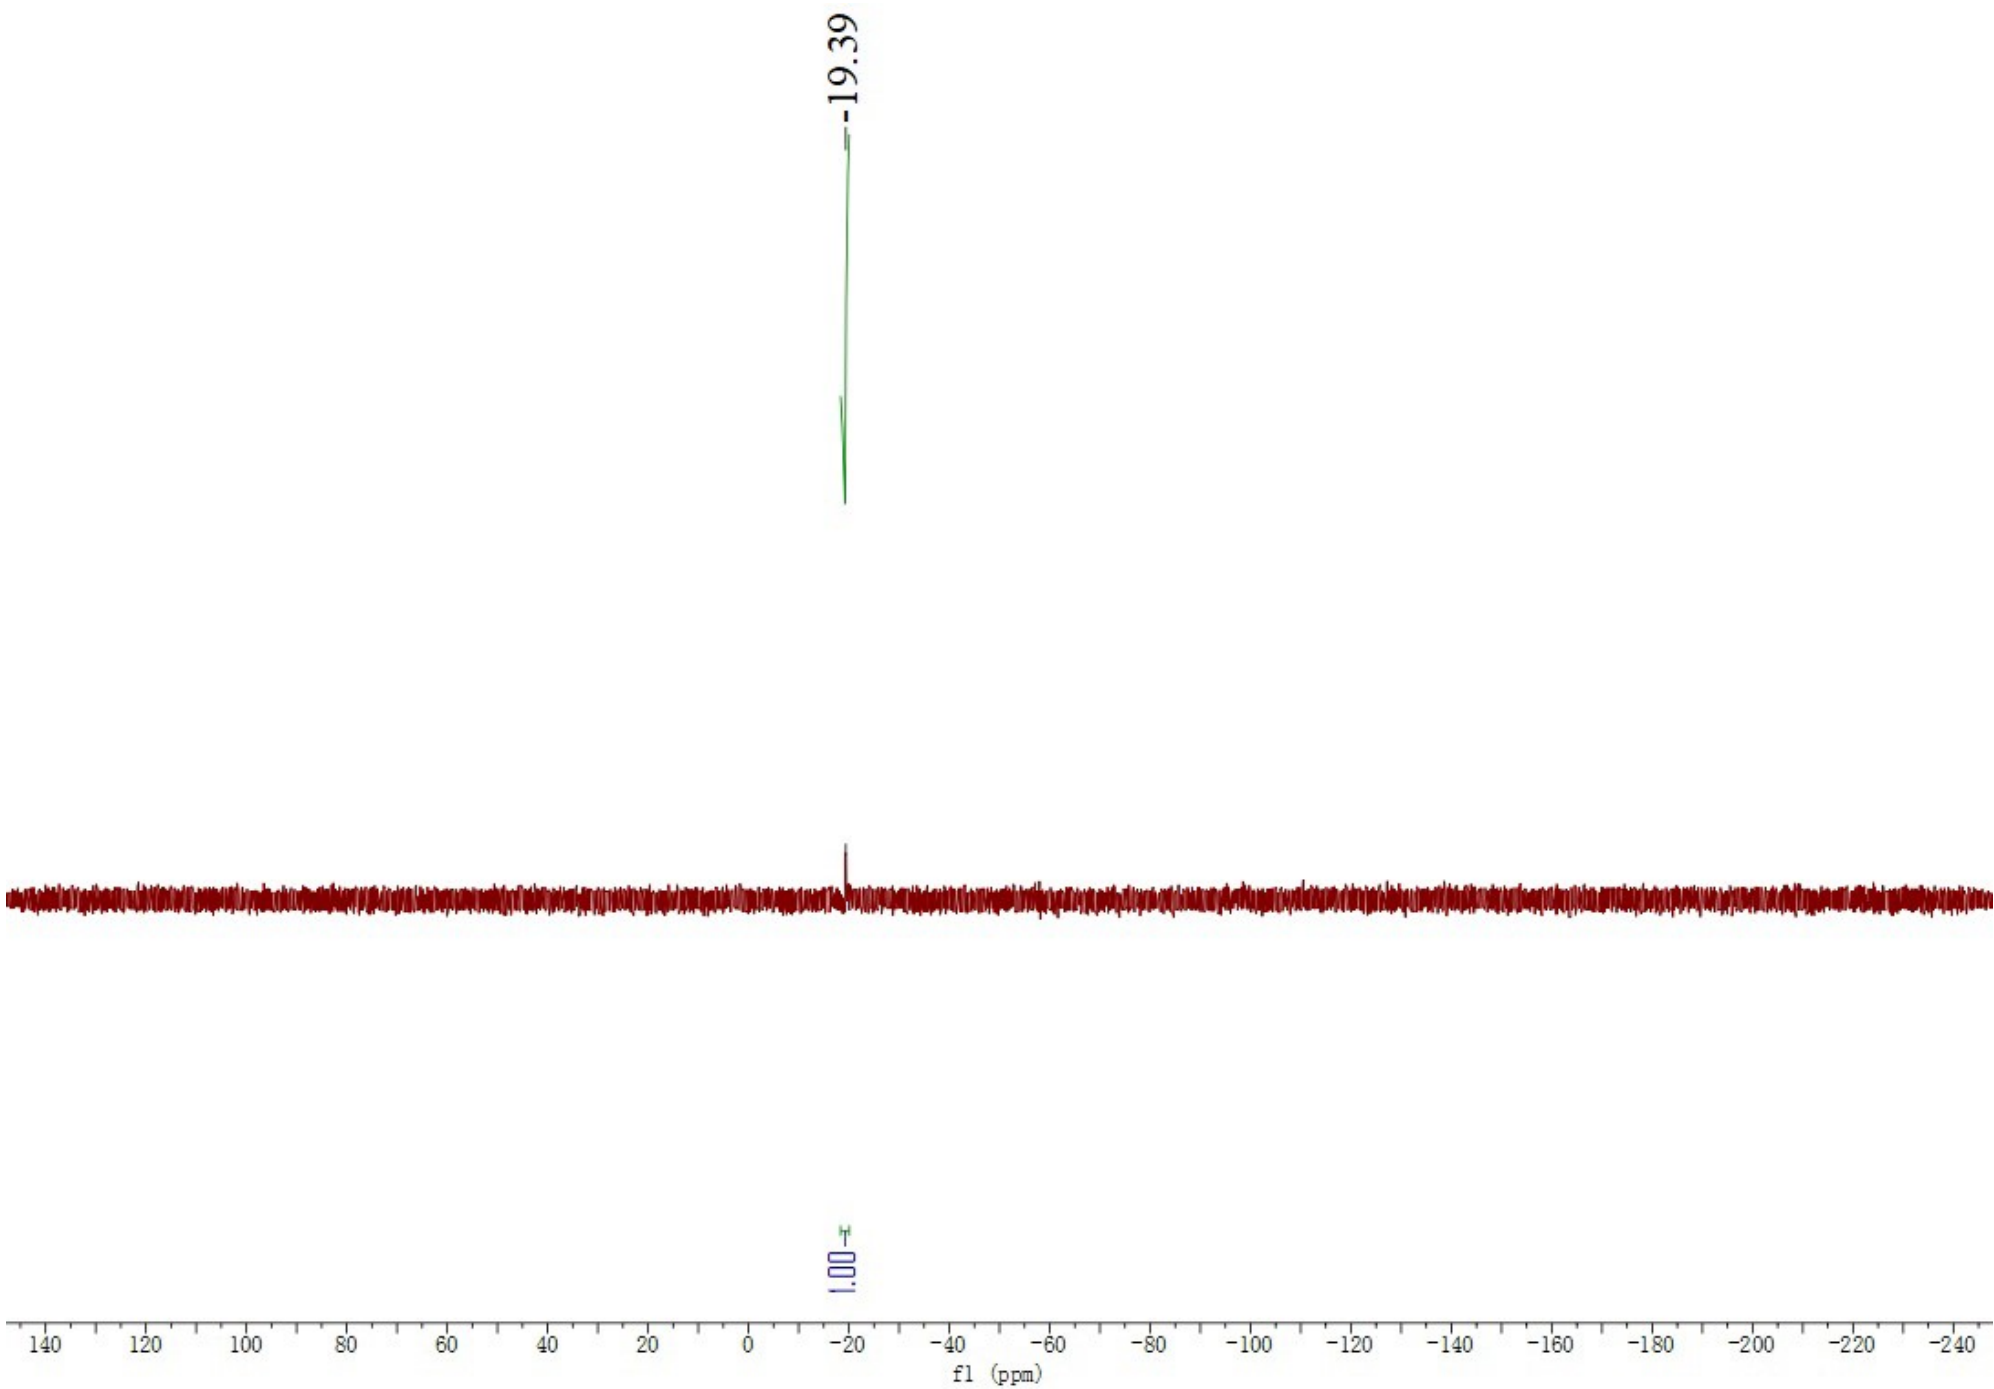

Supplement: d4ce00206g9.pdf [file d4ce00206g9.pdf]
